# Supplementary material for: Downregulation of the long noncoding RNA GAS5-AS1 contributes to tumor metastasis in non-small cell lung cancer
Source: PubMed Central journal article supplement (PMC4973264; doi:10.1038/srep31093), 2016-08-04
Supplement: srep31093-s1.pdf [file srep31093-s1.pdf]

**Downregulation of the long noncoding RNA GAS5-AS1 contributes to tumor metastasis in non-small cell lung cancer**

Ying Wu<sup>1,2</sup>, Hui Lyu<sup>2</sup>, Hongbing Liu<sup>1</sup>, Xuefei Shi<sup>3</sup>, Yong Song<sup>1,\*</sup>, and Bolin Liu<sup>2,\*</sup>

<sup>1</sup>Department of Respiratory Medicine, Jinling Hospital, Nanjing University School of Medicine, Nanjing, China; <sup>2</sup>Department of Pathology, School of Medicine, University of Colorado Anschutz Medical Campus, Aurora, CO, USA; <sup>3</sup>Department of Respiratory Medicine, Huzhou Central Hospital, Huzhou, China

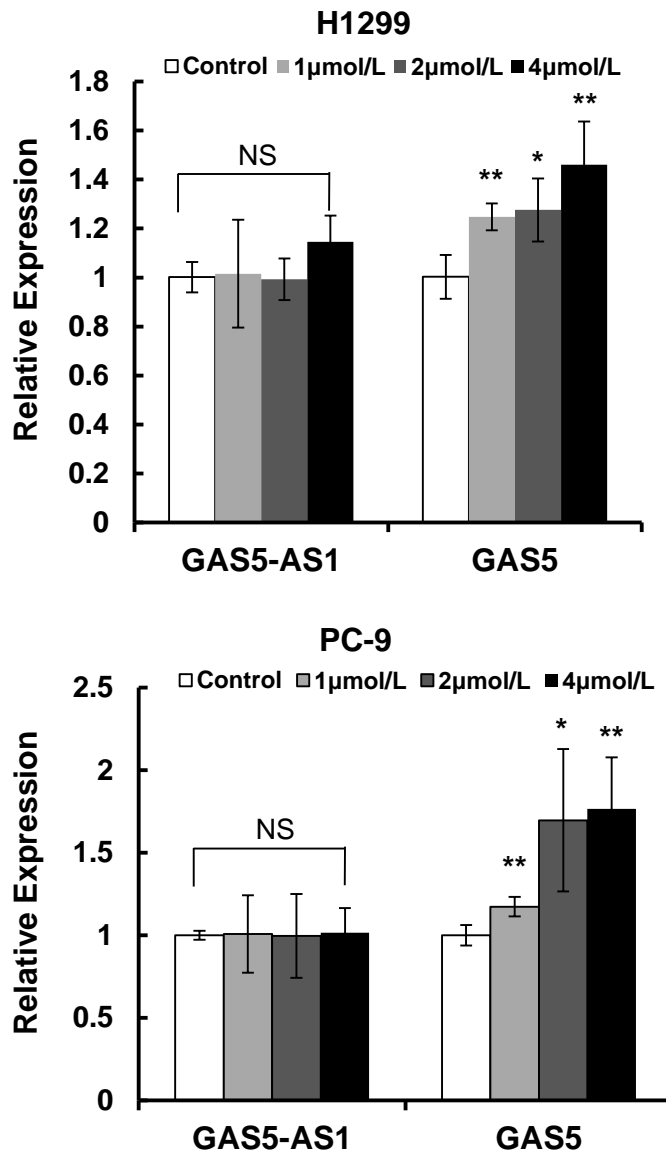

**Supplementary Figure S1.** H1299 or PC-9 cells untreated or treated with the indicated concentrations of decitabine for 48 h were collected and subjected to total RNA extraction. The expression levels of GAS5-AS1 and GAS5 were measured by qRT-PCR. \* $P < 0.05$ , \*\* $P < 0.01$ , NS, not significant

## A H1299

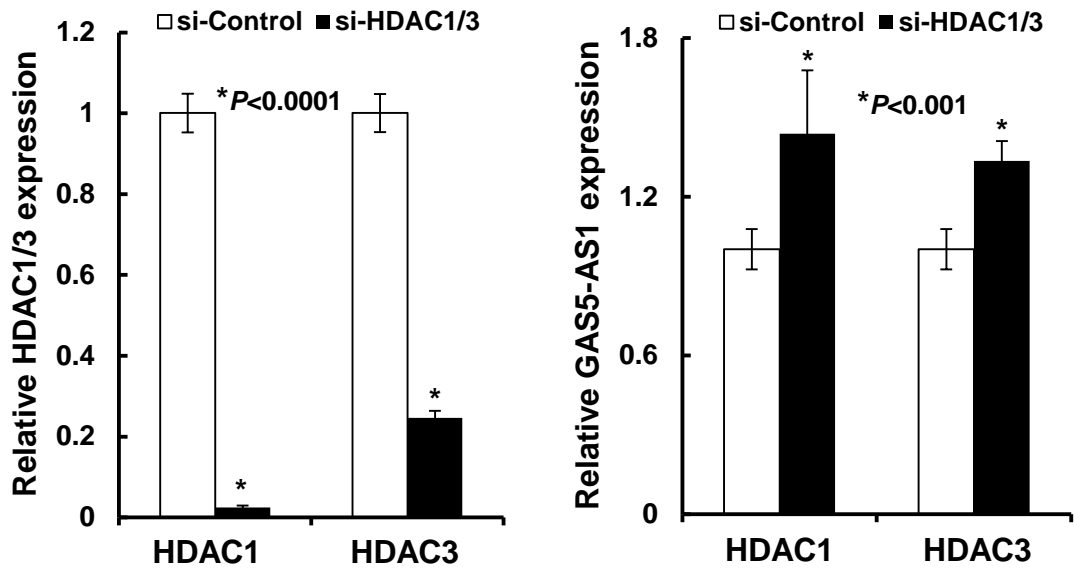

## B PC-9

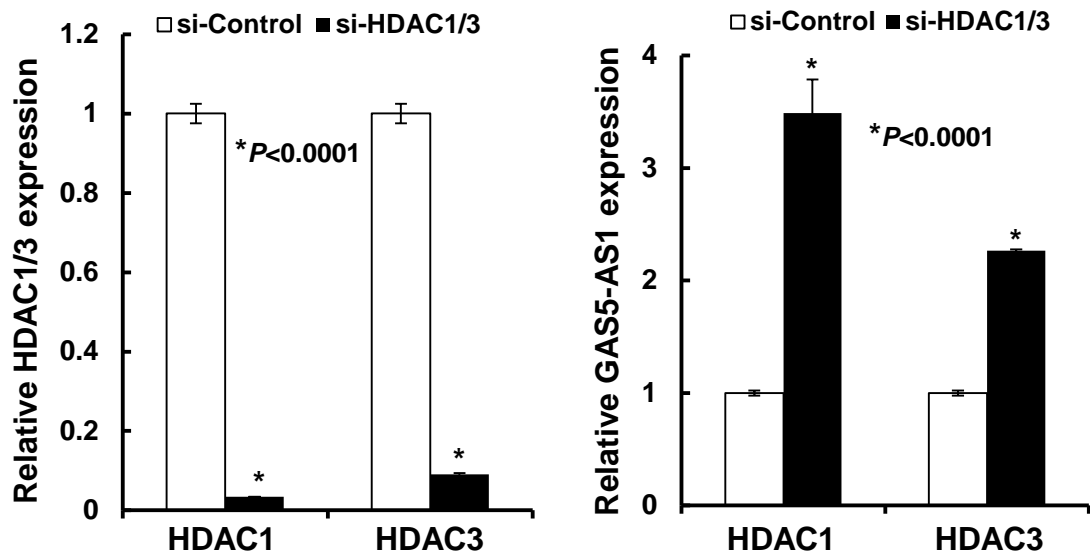

**Supplementary Figure S2.** Control siRNA (si-Control) or specific HDAC1 or HDAC3 siRNA (si-HDAC1/3) was transfected into H1299 or PC-9 cells for 48 hrs. The cells were then collected and subjected to the following studies. (A) qPCR analysis to measure the expression levels of HDAC1/3 and GAS5-AS1 in H1299 cells. (B) qPCR analysis to measure the expression levels of HDAC1/3 and GAS5-AS1 in PC-9 cells. Bars, SD. Data show a representative of three independent experiments.
